# Supplementary material for: Uniform manganese hexacyanoferrate hydrate nanocubes featuring superior performance for low-cost supercapacitors and nonenzymatic electrochemical sensors
Source: Royal Society of Chemistry journal article supplement (doi:10.1039/c5nr04322k), 2015-01-01
Supplement: c5nr04322k1.pdf [file c5nr04322k1.pdf]

Electronic Supplementary Information for

**Uniform manganese hexacyanoferrate hydrate nanocubes featuring  
superior performance for low-cost supercapacitors and  
nonenzymatic electrochemical sensors**

Huan Pang<sup>a,b,†</sup>, Yizhou Zhang<sup>b,†</sup>, Tao Cheng<sup>b</sup>, Wen-Yong Lai<sup>b\*</sup>, and Wei Huang<sup>b\*</sup>

<sup>a</sup> College of Chemistry and Chemical Engineering, Yangzhou University, Yangzhou, Jiangsu 225002 (China)

<sup>b</sup> Key Laboratory for Organic Electronics & Information Displays (KLOEID), Institute of Advanced Materials (IAM), National Jiangsu Synergetic Innovation Center for Advanced Materials (SICAM), Nanjing University of Posts and Telecommunications (NUPT), Nanjing, 210023 (China)

† These authors contributed equally to this work.

\*E-mail: iamwylai@njupt.edu.cn; wei-huang@njtech.edu.cn

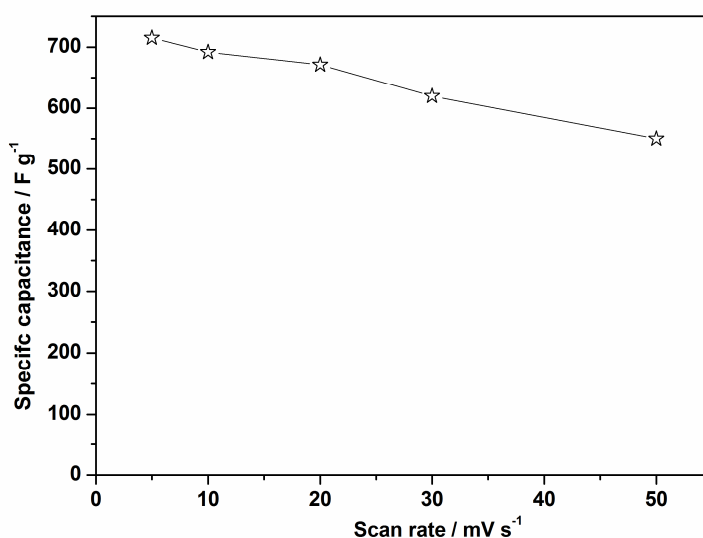

**Figure S1.** The plot of specific capacitance vs. scan rate for as-prepared MHCF nanocube electrode.

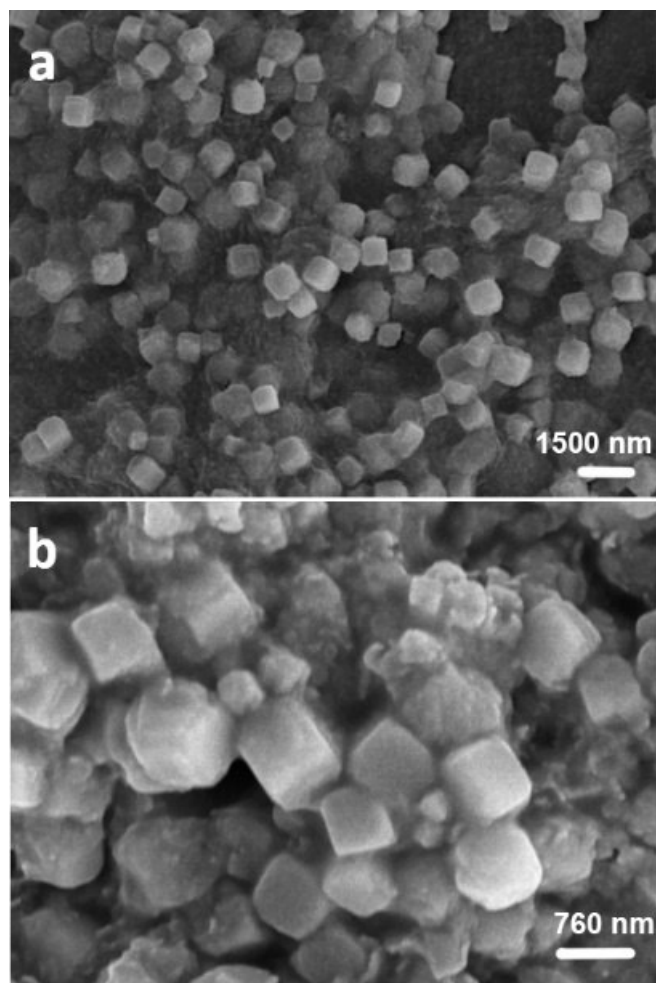

**Figure S2.** a, and b) SEM images of as-prepared samples after 10000 cycles of electrochemical testing.
